# Supplementary material for: ROS-Scavenging Selenofluoxetine Derivatives Inhibit In Vivo Serotonin Reuptake
Source: PubMed Central journal article supplement — ACS Omega. 2022 Mar 2;7(10):8314–22. doi: 10.1021/acsomega.1c05567 (PMC8928538; doi:10.1021/acsomega.1c05567), 2022-03-02
Supplement: ao1c05567_si_001.pdf [file ao1c05567_si_001.pdf]

# Supplementary Material

## ROS-Scavenging Selenofluoxetine Derivatives Inhibit *In Vivo* Serotonin Reuptake

Giovanni Ribaudò,<sup>1†</sup> Marco Bortoli,<sup>2,3†</sup> Colby E. Witt,<sup>6†</sup> Brenna Parke,<sup>4</sup> Sergio Mena,<sup>4</sup> Erika Oselladore,<sup>1</sup> Giuseppe Zagotto,<sup>5</sup> Parastoo Hashemi,<sup>4,6\*</sup> Laura Orian<sup>2\*</sup>

<sup>1</sup> Dipartimento di Medicina Molecolare e Traslazionale, Università degli Studi di Brescia, Viale Europa 11, 25123 Brescia, Italy;

<sup>2</sup> Dipartimento di Scienze Chimiche Università degli Studi di Padova Via Marzolo 1, 35131 Padova, Italy;

<sup>3</sup> Institut de Química Computacional i Catàlisi and Departament de Química, Universitat de Girona, c/Maria Aurèlia Capmany 69, 17003 Girona, Catalonia, Spain;

<sup>4</sup> Department of Bioengineering, Imperial College London, SW7 2AZ, UK;

<sup>5</sup> Dipartimento di Scienze del Farmaco, Università degli Studi di Padova, Via Marzolo 5, 35131 Padova, Italy;

<sup>6</sup> Department of Chemistry and Biochemistry, University of South Carolina, Columbia SC, 29201

†These authors equally contributed to this work

\* To whom correspondence should be addressed: [laura.orian@unipd.it](mailto:laura.orian@unipd.it); [p.hashemi04@imperial.ac.uk](mailto:p.hashemi04@imperial.ac.uk)

## Chemistry

*<sup>1</sup>H-NMR, <sup>13</sup>C-NMR and ESI-MS spectra of the final compounds*

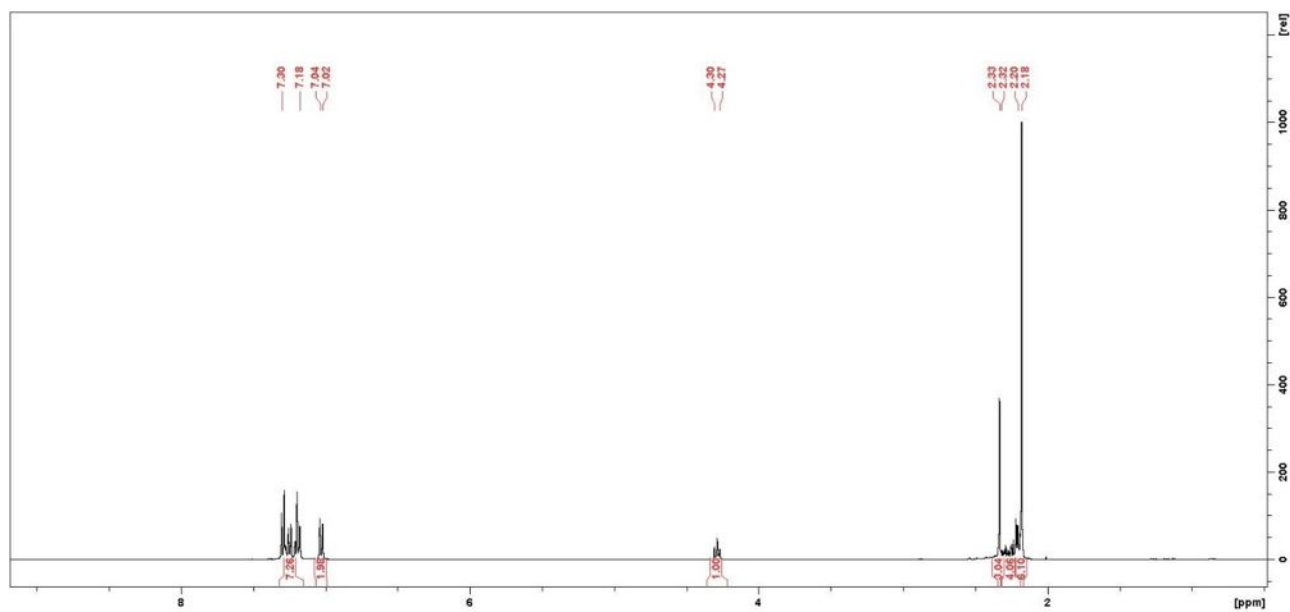

**Figure S1.** <sup>1</sup>H-NMR spectrum of compound 1-CH<sub>3</sub>.

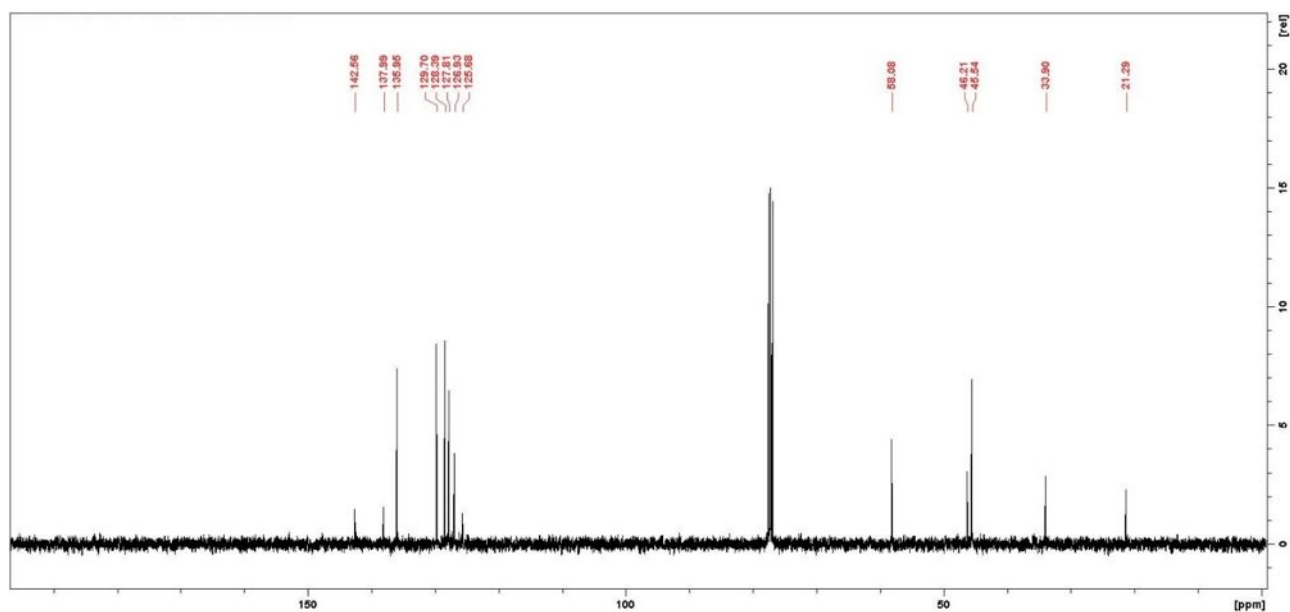

**Figure S2.** <sup>13</sup>C-NMR spectrum of compound 1-CH<sub>3</sub>.

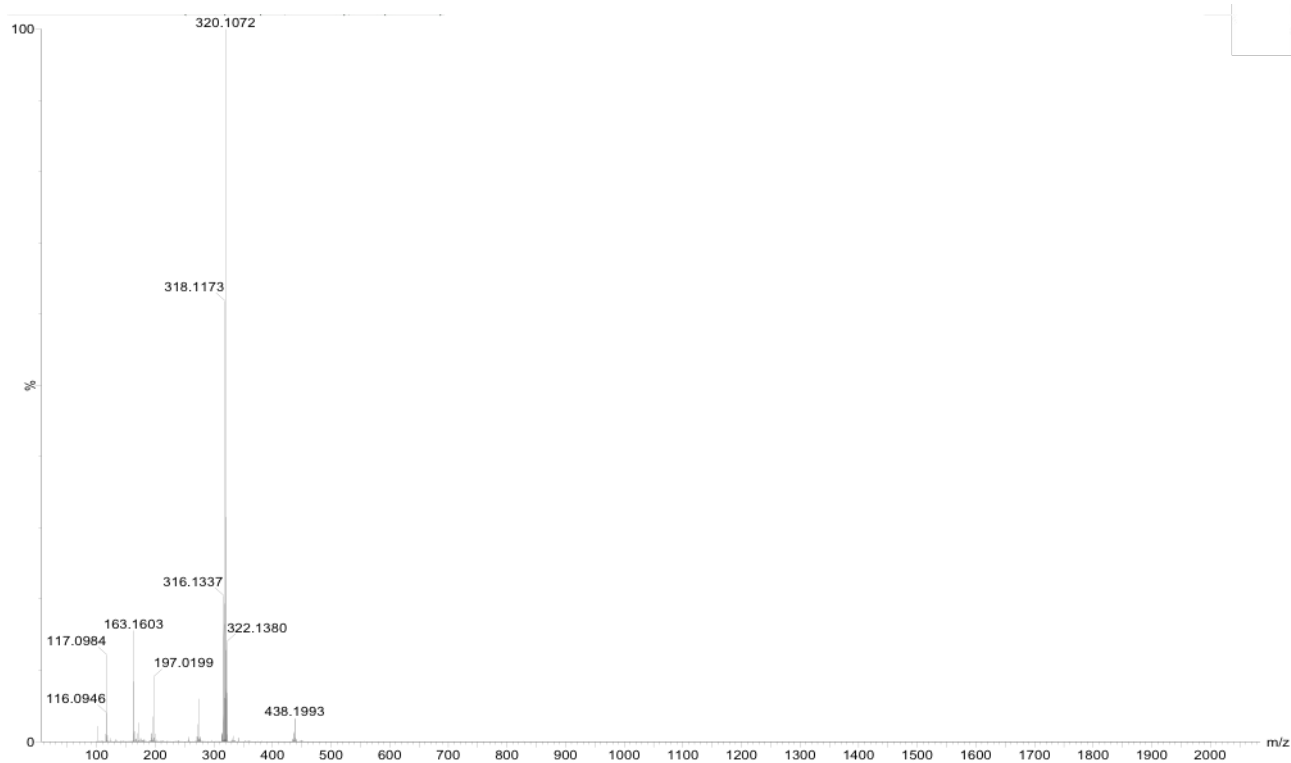

**Figure S3.** ESI-MS spectrum of compound 1-CH<sub>3</sub> (positive ionization mode).

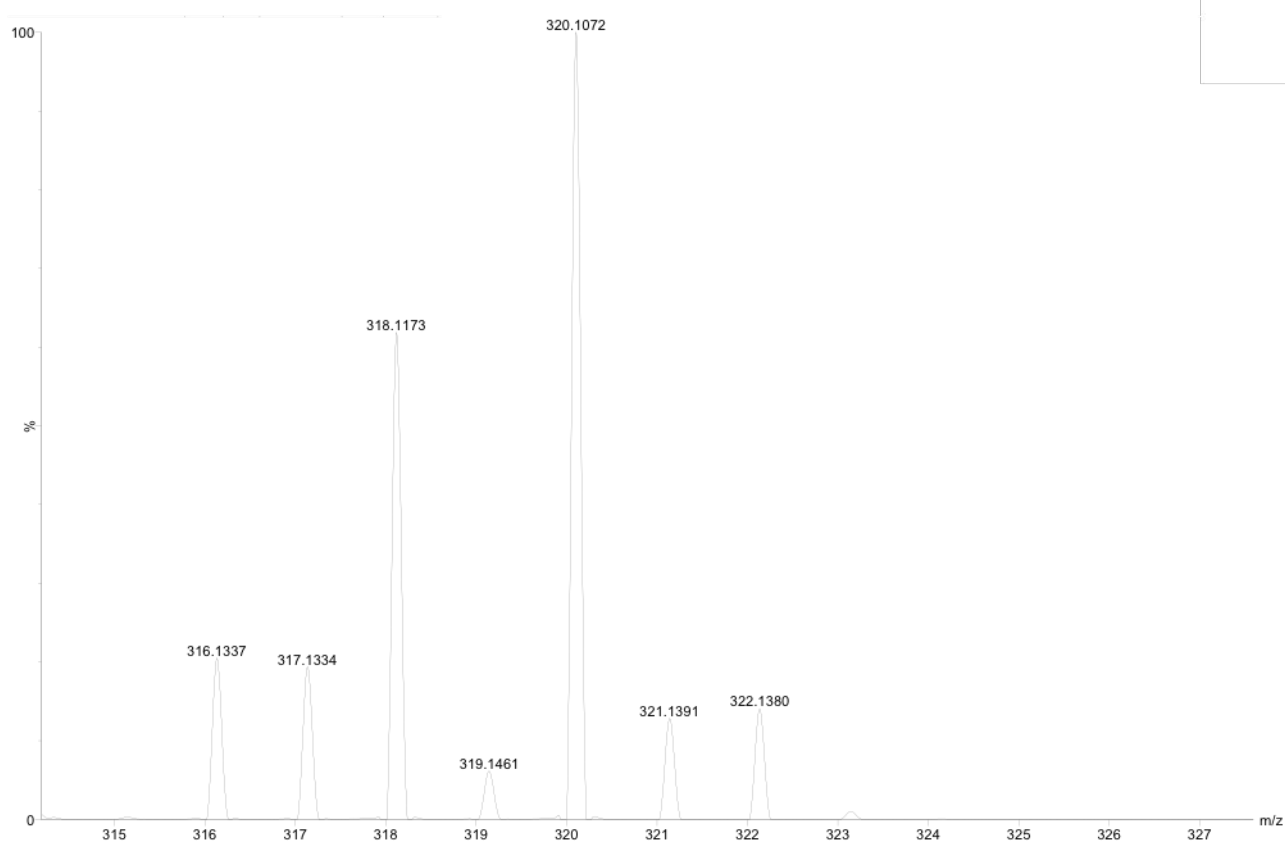

**Figure S4.** Detailed view of the peak of compound 1-CH<sub>3</sub>, showing the isotopic distribution, in the ESI-MS spectrum (positive ionization mode).

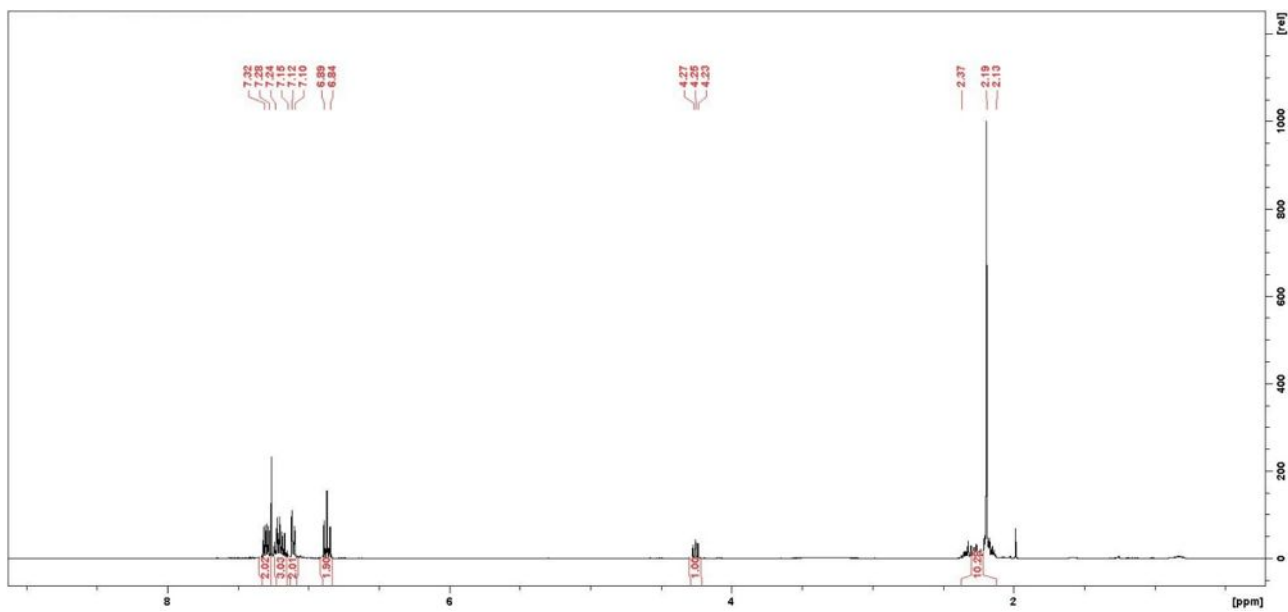

**Figure S5.**  $^1\text{H}$ -NMR spectrum of compound **1-F**.

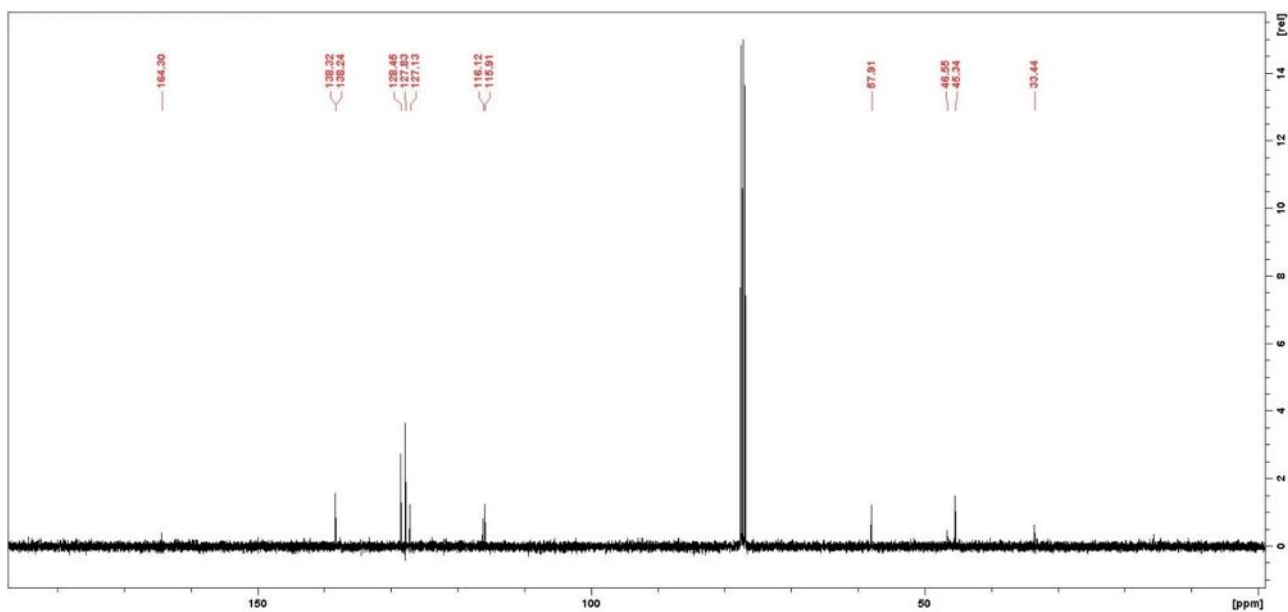

**Figure S6.**  $^{13}\text{C}$ -NMR spectrum of compound **1-F**.

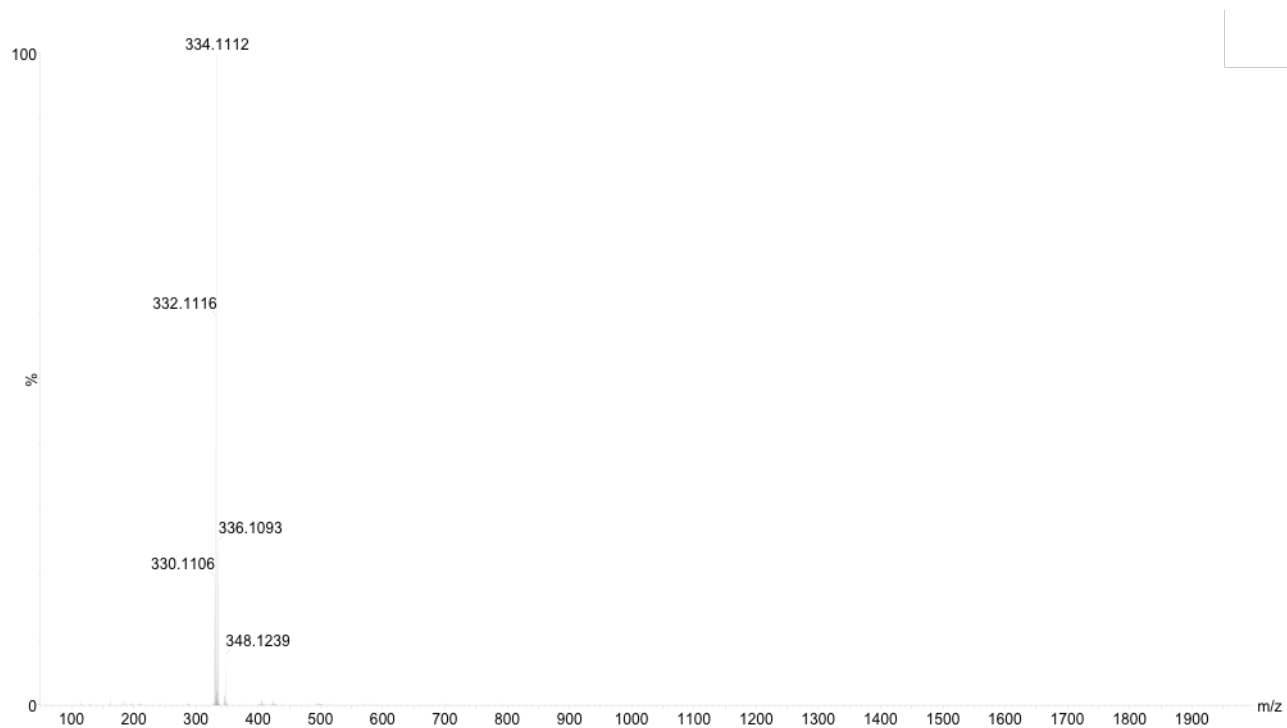

**Figure S7.** ESI-MS spectrum of compound **1-F** (positive ionization mode).

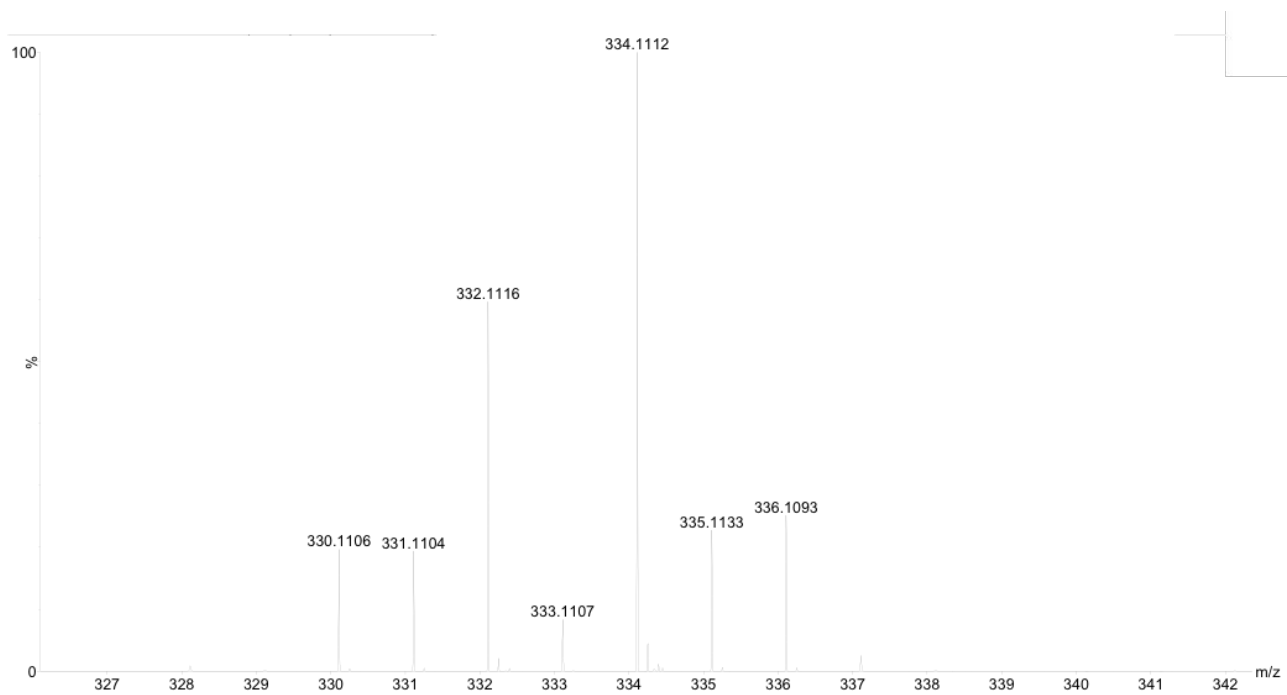

**Figure S8.** Detailed view of the peak of compound **1-F**, showing the isotopic distribution, in the ESI-MS spectrum (positive ionization mode).

### HPLC analysis and stability study

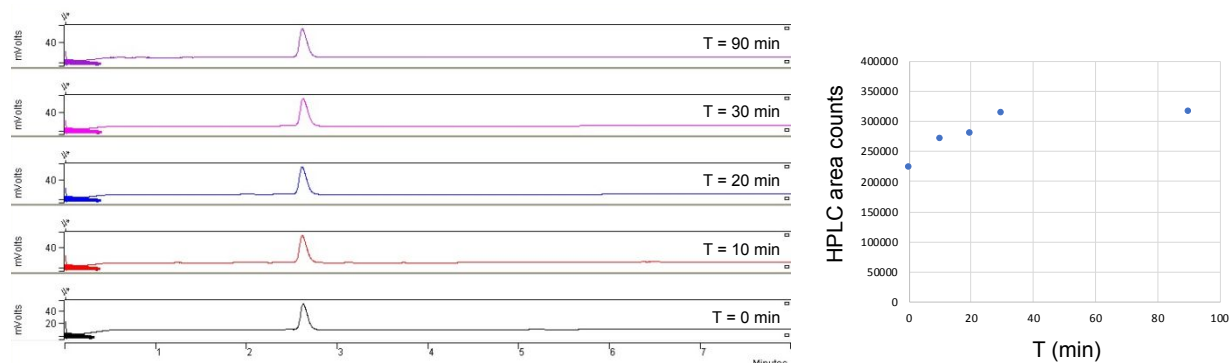

**Figure S9.** HPLC analysis at different time points for compound **1-CH<sub>3</sub>**. Chromatograms were acquired by injecting a 0.2 mg/mL solution of the compound in water.

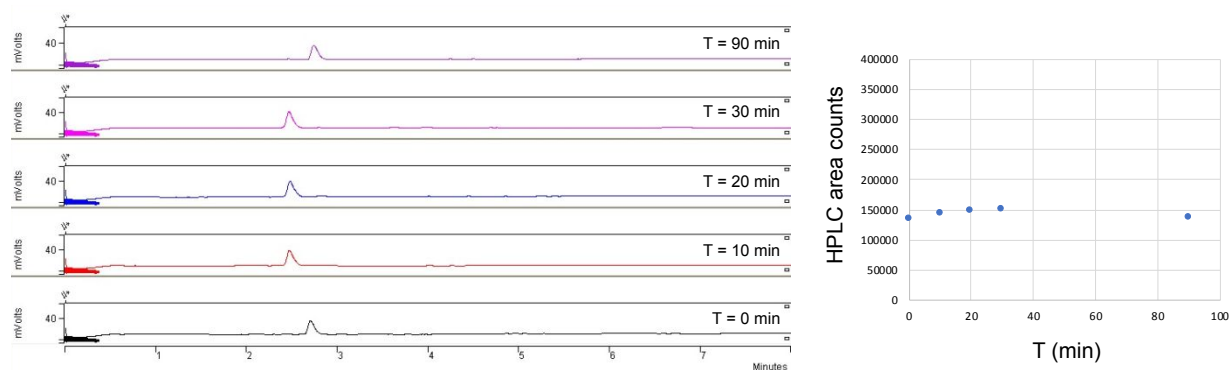

**Figure S10.** HPLC analysis at different time points for compound **1-F**. Chromatograms were acquired by injecting a 0.2 mg/mL solution of the compound in water.

**Table S1.** Coordinates of the optimized structures of selenofluoxetine derivatives. Level of theory M06-2X/6-31G(d,p).

| 1-F                     |               |               |               | 1-F |               |               |               |
|-------------------------|---------------|---------------|---------------|-----|---------------|---------------|---------------|
| Energy=-3213.5141677 Ha |               |               |               | C   | -2.0975685011 | 2.4632146067  | -1.9153198548 |
| NImag=0                 |               |               |               | C   | -2.2654585659 | 3.1352951287  | -0.70545196   |
| C                       | 3.0868678202  | -0.1998310386 | 0.563746953   | C   | -2.2858496233 | 2.4140774443  | 0.4846513357  |
| C                       | 2.5494993625  | 0.6017823604  | -0.4322422415 | C   | -2.1449376606 | 1.0277413302  | 0.4661811479  |
| C                       | 1.485822386   | 0.1093246266  | -1.1817380807 | H   | -2.1836779804 | 0.4568715304  | 1.3899999918  |
| C                       | 0.9734107661  | -1.1641062227 | -0.9281879903 | H   | -2.409224482  | 2.930414391   | 1.432057076   |
| C                       | 1.5362712968  | -1.9482399393 | 0.080180102   | H   | -2.3738776935 | 4.2154762313  | -0.6919775504 |
| C                       | 2.6009032253  | -1.4700395287 | 0.83671104    | H   | -2.0730675154 | 3.019329046   | -2.8478023192 |
| H                       | 3.0565992428  | -2.0588236298 | 1.6249464399  | H   | -1.7741116633 | 0.5532387408  | -2.8667249204 |
| H                       | 1.1336961729  | -2.9386787555 | 0.2678776552  | C   | -3.2294012979 | -1.7973936792 | -1.1970600571 |
| Se                      | -0.4982181565 | -1.839252131  | -1.9373385607 | C   | -4.3989598523 | -1.3585666553 | -0.3154776318 |
| C                       | -1.9082136583 | -1.1608197369 | -0.745803386  | N   | -4.1315778237 | -1.5378842335 | 1.1058301372  |
| C                       | -1.9791963223 | 0.347565879   | -0.7419342252 | C   | -5.128142655  | -0.8460911463 | -1.903262747  |
| C                       | -1.9502986333 | 1.0804009317  | -1.9324864674 | H   | -4.8950602698 | -0.9636836588 | 2.9657827133  |
|                         |               |               |               | H   | -6.1525890556 | -1.2256304562 | 1.7311221336  |
|                         |               |               |               | H   | -5.1089925946 | 0.2213790366  | 1.6622871973  |
|                         |               |               |               | H   | -5.3156865437 | -1.8982521671 | -0.6241729103 |
|                         |               |               |               | H   | -4.5794620038 | -0.2909567945 | -0.4829139953 |

|   |               |               |               |
|---|---------------|---------------|---------------|
| H | -3.4467827485 | -1.5035192359 | -2.2316982789 |
| H | -3.1192869357 | -2.8879294954 | -1.1983600417 |
| H | -1.6642461472 | -1.5178292732 | 0.7524324952  |
| H | 1.0420424763  | 0.7196177821  | -1.9616083255 |
| H | 2.9643443075  | 1.5884657934  | -0.60508853   |
| C | -4.0620243876 | -2.9419286853 | 1.4694676352  |
| H | -3.8695236101 | -3.0313129724 | 2.5424215645  |
| H | -4.9974424859 | -3.4855629972 | 1.2382004669  |
| H | -3.2405015179 | -3.4334900294 | 0.940354722   |
| F | 4.1133932817  | 0.2685696671  | 1.2879387065  |

### 1-F C7 Radical

Energy=-3212.8707494 Ha

NImag=0

|    |               |               |               |
|----|---------------|---------------|---------------|
| C  | 2.3152139075  | -0.7965824281 | 0.9527459726  |
| C  | 2.5993911175  | -1.0231708316 | -0.3848555263 |
| C  | 1.5393815237  | -1.2185011537 | -1.2648329684 |
| C  | 0.2251308369  | -1.2083630609 | -0.7974437277 |
| C  | -0.0397394748 | -0.983382114  | 0.5541716383  |
| C  | 1.0149685747  | -0.7674639558 | 1.4352324842  |
| H  | 0.8444108363  | -0.5840036541 | 2.4905894321  |
| H  | -1.068633015  | -0.986918496  | 0.9102534666  |
| Se | -1.1805002678 | -1.5476104645 | -2.0490455392 |
| C  | -2.5718668246 | -0.4528446711 | -1.3916071961 |
| C  | -2.4144422991 | 0.9705316439  | -1.3075935343 |
| C  | -1.2362281266 | 1.6228969637  | -1.7467139713 |
| C  | -1.0995775396 | 2.9968176221  | -1.6519924009 |
| C  | -2.1282964914 | 3.7793385451  | -1.1248245665 |
| C  | -3.3072251566 | 3.1629132025  | -0.7062713943 |
| C  | -3.4529007117 | 1.7873296854  | -0.7963415476 |
| H  | -4.3847949082 | 1.3367240595  | -0.472667479  |
| H  | -4.121593149  | 3.7610823273  | -0.3086625153 |
| H  | -2.0164669594 | 4.856246434   | -1.051369368  |
| H  | -0.1846684038 | 3.4658634984  | -2.0008267159 |
| H  | -0.447517372  | 1.0258986237  | -2.1898159753 |
| C  | -3.8739258559 | -1.1515700084 | -1.1138296422 |
| C  | -4.2136257289 | -1.3324102575 | 0.3790742422  |
| N  | -3.1503942097 | -1.92122358   | 1.1777438884  |
| C  | -3.5442876941 | -1.956710199  | 2.57589465    |
| H  | -2.715630021  | -2.3370463839 | 3.1802536473  |
| H  | -4.4256345454 | -2.6006863799 | 2.7529222312  |
| H  | -3.7841811087 | -0.9458302616 | 2.9187649886  |
| H  | -5.1415929938 | -1.9362868839 | 0.4427182671  |
| H  | -4.4370977349 | -0.354779869  | 0.8196787255  |
| H  | -4.7051687209 | -0.5930676118 | -1.5648335825 |
| H  | -3.8643741368 | -2.1334886537 | -1.5981224632 |
| H  | 1.7362118817  | -1.3735005431 | -2.3217445698 |
| H  | 3.6303455525  | -1.0293315612 | -0.7206253429 |
| C  | -2.7660553524 | -3.2468217309 | 0.7151147262  |
| H  | -2.0511057578 | -3.6759263714 | 1.423124781   |
| H  | -3.6275088423 | -3.934717724  | 0.6317493523  |
| H  | -2.2655669197 | -3.1636949513 | -0.2517687276 |
| F  | 3.3306000441  | -0.5949087414 | 1.8067761935  |

### 1-F C14 Radical

Energy=-3212.8521503 Ha

NImag=0

|    |               |               |               |
|----|---------------|---------------|---------------|
| C  | 2.7599076804  | -0.518859708  | 0.8023281858  |
| C  | 2.4340244266  | 0.1923558734  | -0.3429452964 |
| C  | 1.2946528459  | -0.174144373  | -1.0521392976 |
| C  | 0.5009050159  | -1.2351911146 | -0.6126287765 |
| C  | 0.8522740789  | -1.9306214092 | 0.5459481002  |
| C  | 1.990011549   | -1.5767976155 | 1.2633143986  |
| H  | 2.2877302774  | -2.1006164276 | 2.1648087374  |
| H  | 0.2295433934  | -2.7534452801 | 0.8833563803  |
| Se | -1.0789608445 | -1.7249410466 | -1.5611145138 |
| C  | -2.2932691227 | -0.4947697041 | -0.5741611507 |
| C  | -1.9944680566 | 0.9482485571  | -0.9187633851 |

|   |               |               |               |
|---|---------------|---------------|---------------|
| C | -1.8329783859 | 1.3684976422  | -2.2427831526 |
| C | -1.6271880441 | 2.7116850251  | -2.5348882934 |
| C | -1.56042686   | 3.6520413716  | -1.5070194083 |
| C | -1.7037107721 | 3.2385343735  | -0.186529247  |
| C | -1.9210001557 | 1.8932062319  | 0.1047504415  |
| H | -2.0355198936 | 1.5706300479  | 1.1366154504  |
| H | -1.6422209329 | 3.9616955131  | 0.62111015138 |
| H | -1.3904260548 | 4.6994323648  | -1.736249884  |
| H | -1.5074521868 | 3.0259234702  | -3.5674722096 |
| H | -1.8412835772 | 0.6246749183  | -3.0350071213 |
| C | -3.6885020184 | -0.8882943006 | -0.8948418238 |
| C | -4.6660285253 | -1.2767020314 | 0.16879873    |
| N | -4.05295495   | -1.9435476182 | 1.3091867379  |
| C | -5.0161684857 | -2.0964522997 | 2.3848263645  |
| H | -4.5293957058 | -2.5577062643 | 3.248728218   |
| H | -5.8776550912 | -2.7279172582 | 2.0972758756  |
| H | -5.3953357295 | -1.1158199378 | 2.6872546028  |
| H | -5.4685337052 | -1.8963424666 | -0.2812695636 |
| H | -5.1654218118 | -0.3709778499 | 0.5538385348  |
| H | -4.0721525747 | -0.6543733892 | -1.8836042975 |
| H | -2.1040390391 | -0.6792976016 | 0.4867096129  |
| H | 1.0120201306  | 0.3707303088  | -1.9472001118 |
| H | 3.0671766057  | 1.0135382159  | -0.6596903822 |
| C | -3.4935583426 | -3.2356117239 | 0.9360947711  |
| H | -3.0599554803 | -3.7083238067 | 1.8225779772  |
| H | -4.2575377151 | -3.9182411211 | 0.5189774135  |
| H | -2.7002459301 | -3.1029488456 | 0.195988927   |
| F | 3.8582229409  | -0.1720996562 | 1.4885583711  |

### 1-F C15 Radical

Energy=-3212.8589215 Ha

NImag=0

|    |               |               |                |
|----|---------------|---------------|----------------|
| C  | 2.8824299463  | -0.4363499803 | 0.7689059522   |
| C  | 2.5343358403  | 0.2519921017  | -0.3836703224  |
| C  | 1.4143254768  | -0.1652686266 | -1.0954273831  |
| C  | 0.6598622199  | -1.2526642162 | -0.651628501   |
| C  | 1.0351192466  | -1.9261653199 | 0.512147256    |
| C  | 2.1538684653  | -1.5217009225 | 1.2329241542   |
| H  | 2.4684418076  | -2.0278535387 | 2.1387594966   |
| H  | 0.4474218491  | -2.7738829453 | 0.8509262796   |
| Se | -0.8903747398 | -1.8171200904 | -1.6077797952  |
| C  | -2.1661837586 | -0.6824244571 | -0.6449842515  |
| C  | -1.9948983278 | 0.7905341648  | -0.913037886   |
| C  | -1.7116219897 | 1.2789094249  | -2.1924177224  |
| C  | -1.6504529782 | 2.6476731114  | -2.4277101562  |
| C  | -1.8611643613 | 3.5495636592  | -1.38252665146 |
| C  | -2.1350590538 | 3.0718093809  | -0.107522283   |
| C  | -2.2006454963 | 1.6995682613  | 0.1259708806   |
| H  | -2.4172440983 | 1.3242931015  | 1.123443264    |
| H  | -2.294052682  | 3.7667192006  | 0.7116116985   |
| H  | -1.8065183851 | 4.6181329498  | -1.5689574015  |
| H  | -1.4313035697 | 3.0130647929  | -3.4266542246  |
| H  | -1.5224316177 | 0.5671935432  | -2.991770749   |
| C  | -3.6008189089 | -1.1828465674 | -1.0054882097  |
| C  | -4.5041370435 | -1.1876883006 | 0.1809969025   |
| N  | -4.1203147349 | -1.9269950972 | 1.2965896691   |
| C  | -5.0783372016 | -1.9703245878 | 2.3838730617   |
| H  | -4.5832927153 | -2.3139749784 | 3.2966967789   |
| H  | -5.9234242825 | -2.6422284904 | 2.1674121628   |
| H  | -5.4717395717 | -0.9659136247 | 2.5602993689   |
| H  | -5.0724496761 | -0.2917874862 | 0.4160943314   |
| H  | -4.0179085818 | -0.5337452582 | -1.7801676933  |
| H  | -3.5345747282 | -2.189126497  | -1.4436583164  |
| H  | -1.9872439055 | -0.8776487588 | 0.4160810099   |
| H  | 1.1173650318  | 0.3608427632  | -1.9967612315  |
| H  | 3.135722724   | 1.095411112   | -0.7038359962  |
| C  | -3.4416994528 | -3.1935008497 | 1.0702061677   |
| H  | -3.0701478176 | -3.5704433247 | 2.0271416319   |
| H  | -4.1131747071 | -3.9509701568 | 0.6339440799   |
| H  | -2.5871311343 | -3.0611515696 | 0.3996990776   |
| F  | 3.9621068654  | -0.0407708587 | 1.4581643466   |

### 1-F C17 Radical

Energy=-3212.8553992 Ha

NImag=0

|    |               |               |               |
|----|---------------|---------------|---------------|
| C  | 3.0622628791  | -0.2084699097 | 0.5831936894  |
| C  | 2.5240593106  | 0.5962233106  | -0.4099273851 |
| C  | 1.4644088209  | 0.1033735628  | -1.1646354531 |
| C  | 0.9562885754  | -1.1732594756 | -0.9183371729 |
| C  | 1.5194814968  | -1.9604562135 | 0.0874269638  |
| C  | 2.5807057327  | -1.4820078351 | 0.8485704431  |
| H  | 3.0371198165  | -2.0730671541 | 1.6346646736  |
| H  | 1.1205428578  | -2.9534787046 | 0.269155936   |
| Se | -0.5098178874 | -1.8477596173 | -1.9358201502 |
| C  | -1.9264329764 | -1.1629354203 | -0.7552402116 |
| C  | -1.9833722836 | 0.3454744866  | -0.7449590085 |
| C  | -1.9624057196 | 1.0794166043  | -1.9354786543 |
| C  | -2.0965463979 | 2.4631016659  | -1.9147481548 |
| C  | -2.2433864221 | 3.1350623393  | -0.7016412229 |
| C  | -2.2550299301 | 2.4130507792  | 0.4876469904  |
| C  | -2.1265405036 | 1.0252696676  | 0.4655996669  |
| H  | -2.1552872879 | 0.4584174347  | 1.3925330126  |
| H  | -2.3626163131 | 2.9285209907  | 1.4372837577  |
| H  | -2.3423930341 | 4.2160552655  | -0.6856124    |
| H  | -2.0786631866 | 3.0203635452  | -2.8466408191 |
| H  | -1.8016900866 | 0.5520779517  | -2.872482476  |
| C  | -3.2478123564 | -1.7862747786 | -1.2228705804 |
| C  | -4.4265452542 | -1.3456316363 | -0.3539778603 |
| N  | -4.1816744149 | -1.5493451533 | 1.067224858   |
| C  | -4.891903047  | -0.7275569296 | 1.9324320595  |
| H  | -4.7561611956 | -0.9245734423 | 2.9905481742  |
| H  | -5.0062353797 | 0.3034138214  | 1.6141342323  |
| H  | -5.3401078456 | -1.87523962   | -0.672142363  |
| H  | -4.5985763045 | -0.2753325339 | -0.5026358925 |
| H  | -3.4536143604 | -1.4848129183 | -2.257541714  |
| H  | -3.1472646616 | -2.8778404133 | -1.2303056329 |
| H  | -1.6933218771 | -1.5267373417 | 0.2489359946  |
| H  | 1.0204932513  | 0.7156118063  | -1.9428979456 |
| H  | 2.935658014   | 1.585266052   | -0.5768969454 |
| C  | -4.0544320571 | -2.9382397285 | 1.4651484179  |
| H  | -3.8338713664 | -2.9857987126 | 2.5341031257  |
| H  | -4.9767576973 | -3.5084740835 | 1.2720724692  |
| H  | -3.2300592488 | -3.4149763129 | 0.9269757061  |
| F  | 4.0851012936  | 0.2600417153  | 1.3119618042  |

### 1-F TS@C7

Energy=-3289.2145755 Ha

NImag=1 (-969.09 cm<sup>-1</sup>)

|    |               |               |               |
|----|---------------|---------------|---------------|
| C  | 3.855342311   | -0.0867928064 | 1.0720963469  |
| C  | 3.6739380646  | 0.4853671103  | -0.1778479072 |
| C  | 2.6042018318  | 0.053859591   | -0.9555449488 |
| C  | 1.7486918309  | -0.9403442141 | -0.4827011295 |
| C  | 1.956321565   | -1.5055695006 | 0.7767729476  |
| C  | 3.0134594519  | -1.0713286615 | 1.5688932885  |
| H  | 3.1948741881  | -1.4819704696 | 2.5557083281  |
| H  | 1.2736748435  | -2.2660264418 | 1.1425261562  |
| Se | 0.267308084   | -1.5111127779 | -1.5378540936 |
| C  | -1.0878116395 | -0.566482628  | -0.5141084099 |
| C  | -0.7772990791 | 0.8948483493  | -0.351574282  |
| C  | -0.5585250223 | 1.693494732   | -1.4803868413 |
| C  | -0.3310042677 | 3.0572975516  | -1.3431914982 |
| C  | -0.3051312036 | 3.6382909089  | -0.0752288109 |
| C  | -0.5014843002 | 2.8451153587  | 1.0504479297  |
| C  | -0.7369437955 | 1.4775844781  | 0.915466745   |
| H  | -0.8702785504 | 0.843710714   | 1.7871620262  |
| H  | -0.4638163125 | 3.2880396694  | 2.0411621933  |
| H  | -0.1629385895 | 3.6679480079  | -2.2253272868 |
| H  | -0.5312559132 | 1.2212195055  | -2.459707062  |
| C  | -2.4626630111 | -0.8529696833 | -1.1203155669 |
| C  | -3.6182380655 | -0.1933393166 | -0.3668572648 |
| N  | -3.800374197  | -0.6745225297 | 1.0044576167  |

|   |               |               |               |
|---|---------------|---------------|---------------|
| C | -4.7139513773 | 0.2032872164  | 1.7242846736  |
| H | -4.830849667  | -0.1523342042 | 2.7515657216  |
| H | -5.7117835852 | 0.242525145   | 1.2537266148  |
| H | -4.3001521792 | 1.2150574525  | 1.7516908544  |
| H | -4.5502328951 | -0.3358375918 | -0.9448591774 |
| H | -3.4288266994 | 0.8843781887  | -0.3174843937 |
| H | -2.4808186822 | -0.4639990646 | -2.1474067795 |
| H | -2.6044051678 | -1.9369418563 | -1.1987583206 |
| H | -1.0282157787 | -1.1004262073 | 0.5335716374  |
| H | 2.4235367844  | 0.4973035914  | -1.9292859883 |
| H | 4.3560697573  | 1.2568125409  | -0.5168746394 |
| O | -1.2347220049 | -1.5135099618 | 1.847922679   |
| H | -2.1488150955 | -1.1307902582 | 1.8539914765  |
| H | -0.1203553564 | 4.7027431819  | 0.031926023   |
| F | 4.8806792923  | 0.3291719823  | 1.8296547822  |
| C | -4.2841500094 | -2.0512118809 | 1.027629003   |
| H | -3.5328642876 | -2.7207726397 | 0.6031993407  |
| H | -4.4515536368 | -2.3569251162 | 2.0640699956  |
| H | -5.229608172  | -2.1662510903 | 0.469988925   |

### 1-F TS@C14

Energy=-3289.2085238 Ha

NImag= 1 (-1374.05 cm<sup>-1</sup>)

|    |               |               |               |
|----|---------------|---------------|---------------|
| C  | 4.053758656   | -0.0816480353 | 1.0356005971  |
| C  | 3.5445472836  | 0.9945863351  | 0.3240008081  |
| C  | 2.474138669   | 0.7759815791  | -0.5370947864 |
| C  | 1.931863469   | -0.5026089317 | -0.6726738021 |
| C  | 2.460170786   | -1.5670153896 | 0.0587596065  |
| C  | 3.5321830521  | -1.3622294667 | 0.9205474274  |
| H  | 3.9655576361  | -2.1694199865 | 1.5002776175  |
| H  | 2.0304565149  | -2.5581178203 | -0.0483881825 |
| Se | 0.4443934455  | -0.791496085  | -1.8280190863 |
| C  | -0.9216552631 | -0.4115276795 | -0.4643106672 |
| C  | -1.042206508  | 1.0712858552  | -0.1907344425 |
| C  | -1.1099842182 | 1.9990989385  | -1.2345294786 |
| C  | -1.3003437373 | 3.350505999   | -0.9668196205 |
| C  | -1.4108170049 | 3.7950628372  | 0.3496735082  |
| C  | -1.3303652434 | 2.8788431639  | 1.3944811927  |
| C  | -1.1489508138 | 1.5235479707  | 1.1261769765  |
| H  | -1.1111198684 | 0.8002524634  | 1.9355679579  |
| H  | -1.4061573614 | 3.2179401797  | 2.4233178054  |
| H  | -1.5528180731 | 4.8509000745  | 0.5584741439  |
| H  | -1.35369599   | 4.0597897218  | -1.7872282145 |
| H  | -0.9826459077 | 1.6541023784  | -2.2572044561 |
| C  | -2.2431135832 | -1.0105105204 | -0.9358923446 |
| C  | -3.3981635635 | -0.7649821737 | 0.0233711555  |
| N  | -3.0559249364 | -1.0542461051 | 1.4074098939  |
| C  | -3.9782767815 | -0.3941655241 | 2.3143982434  |
| H  | -3.6896219388 | -0.6115493629 | 3.3471165391  |
| H  | -5.0245592965 | -0.7232106729 | 2.1750796659  |
| H  | -3.9294209827 | 0.6892636334  | 2.1636384814  |
| H  | -4.2884108201 | -1.3301648892 | -0.311195032  |
| H  | -3.6526659741 | 0.3016253662  | -0.0415495116 |
| H  | -2.5039893157 | -0.6990088885 | -1.9544153821 |
| H  | -2.0571090129 | -2.2071655229 | -1.0413522377 |
| H  | -0.6054191479 | -0.9306162905 | 0.4435153894  |
| H  | 2.0501302019  | 1.6006046124  | -1.101159605  |
| H  | 3.9854231566  | 1.976657491   | 0.4527035576  |
| O  | -1.4573273883 | -3.3969398223 | -1.1093208468 |
| H  | -0.5844910337 | -3.0499279111 | -1.3932648432 |
| F  | 5.0864562945  | 0.1221156732  | 1.8641953244  |
| C  | -3.0125565397 | -2.4874127708 | 1.6637780495  |
| H  | -2.6991218734 | -2.6585194251 | 2.6979520125  |
| H  | -3.9999566496 | -2.963676321  | 1.5182919727  |
| H  | -2.2967933339 | -2.9737288423 | 0.9967807834  |

### 1-F TS@C15

Energy=-3289.2056544 Ha

NImag= 1 (-1222.94 cm<sup>-1</sup>)

|   |              |              |              |
|---|--------------|--------------|--------------|
| C | 4.1492093261 | 0.6277625778 | 0.9696695263 |
|---|--------------|--------------|--------------|



|    |               |               |               |   |               |               |               |
|----|---------------|---------------|---------------|---|---------------|---------------|---------------|
| C  | 3.5428217041  | 1.238361479   | -0.118025972  | H | -4.196770123  | -1.0955227765 | -0.4728019738 |
| C  | 2.5218833179  | 0.561453923   | -0.7773051171 | H | -3.3298545762 | 0.4512723691  | -0.3447825259 |
| C  | 2.1190370243  | -0.7030936817 | -0.3444009787 | H | -2.1747125336 | -0.9266789286 | -1.9488683176 |
| C  | 2.7495071728  | -1.2931128754 | 0.7523797168  | H | -2.0509703823 | -2.287965218  | -0.8438361418 |
| C  | 3.7728875644  | -0.6290839487 | 1.4203677374  | H | -0.5952212574 | -0.9897437491 | 0.6737891336  |
| H  | 4.2800884136  | -1.0649287777 | 2.2738122634  | H | 2.4133048782  | 0.9732599528  | -1.4441322487 |
| H  | 2.4336926681  | -2.2790854585 | 1.0786846168  | H | 4.2999083782  | 1.7748077293  | 0.0009005506  |
| Se | 0.7056299405  | -1.6263692674 | -1.2322977253 | O | -6.3296859272 | -1.06060526   | 1.0561161561  |
| C  | -0.7508536241 | -0.9074112034 | -0.1210342402 | H | -6.4333057494 | -0.4097354557 | 0.3342514924  |
| C  | -0.8995452709 | 0.5831911418  | -0.2879281459 | F | 5.2280668739  | 0.4723907074  | 2.0226478696  |
| C  | -0.9835195485 | 1.1638680255  | -1.5578364906 | C | -3.1962927863 | -2.1528349977 | 1.7477358563  |
| C  | -1.2107142731 | 2.5281065952  | -1.6967179853 | H | -4.1626593978 | -2.6094401491 | 1.4771544786  |
| C  | -1.338404891  | 3.3363071161  | -0.5660120296 | H | -2.385474121  | -2.7281576428 | 1.2931116864  |
| C  | -1.232963332  | 2.769536794   | 0.7021728434  | H | -3.0771877479 | -2.1993435478 | 2.8334226163  |
| C  | -1.0182513843 | 1.3978612576  | 0.8396695768  |   |               |               |               |
| H  | -0.9731836584 | 0.944955479   | 1.8257777718  |   |               |               |               |
| H  | -1.3261134784 | 3.3921129584  | 1.5866594629  |   |               |               |               |
| H  | -1.5151998363 | 4.4017181277  | -0.6746637829 |   |               |               |               |
| H  | -1.2893097717 | 2.9640026129  | -2.6877683641 |   |               |               |               |
| H  | -0.8466124455 | 0.5336188869  | -2.4327125196 |   |               |               |               |
| C  | -2.0249658405 | -1.6744830178 | -0.5009469247 |   |               |               |               |
| C  | -3.2308240163 | -1.2617974901 | 0.3269674743  |   |               |               |               |
| N  | -2.9861176265 | -1.1598849751 | 1.7387538147  |   |               |               |               |
| C  | -4.148511664  | -0.6221651851 | 2.4300991783  |   |               |               |               |
| H  | -3.9009502319 | -0.4530681972 | 3.4820472114  |   |               |               |               |
| H  | -5.0157007496 | -1.3052582009 | 2.3815801154  |   |               |               |               |
| H  | -4.4289848499 | 0.3252653773  | 1.9644542274  |   |               |               |               |
| H  | -4.1198646625 | -1.8722963652 | 0.0760106566  |   |               |               |               |
| H  | -3.5880246807 | -0.1835619992 | -0.0494174942 |   |               |               |               |
| H  | -2.2609971026 | -1.5024401667 | -1.5582737369 |   |               |               |               |
| H  | -1.8355052401 | -2.7514096394 | -0.3967457513 |   |               |               |               |
| H  | -0.4839626244 | -1.1290390648 | 0.9147418381  |   |               |               |               |
| H  | 2.026306377   | 1.0195232935  | -1.6271351616 |   |               |               |               |
| H  | 3.873225787   | 2.2226122564  | -0.4303592412 |   |               |               |               |
| O  | -4.0947810742 | 1.0453485009  | -0.3749145817 |   |               |               |               |
| H  | -3.2920775528 | 1.5717824082  | -0.1816523188 |   |               |               |               |
| F  | 5.135014066   | 1.2738729886  | 1.6075457127  |   |               |               |               |
| C  | -2.5660651566 | -2.4244402541 | 2.3279951243  |   |               |               |               |
| H  | -2.3826674476 | -2.2764141225 | 3.3959277665  |   |               |               |               |
| H  | -3.3308359712 | -3.2136227247 | 2.2134894362  |   |               |               |               |
| H  | -1.6374363652 | -2.777143848  | 1.8708394414  |   |               |               |               |

### 1-F TS@C17

Energy=-3289.2064877 Ha

NImag=1 (-587.81 cm<sup>-1</sup>)

|    |               |               |               |
|----|---------------|---------------|---------------|
| C  | 4.2203332957  | 0.0401564273  | 1.2516146493  |
| C  | 3.8062175641  | 0.8278089412  | 0.1878626386  |
| C  | 2.7614399223  | 0.3727193998  | -0.6100275118 |
| C  | 2.1456045465  | -0.8499278924 | -0.3370333911 |
| C  | 2.5855493016  | -1.6216373896 | 0.7397664517  |
| C  | 3.6298317085  | -1.1802282819 | 1.5454478064  |
| H  | 3.9916627769  | -1.7604186889 | 2.3869156097  |
| H  | 2.1042368131  | -2.5734063367 | 0.9417427404  |
| Se | 0.7007697302  | -1.4706464483 | -1.4168066212 |
| C  | -0.7352627626 | -0.6474779416 | -0.3546541282 |
| C  | -0.6844458433 | 0.8606109387  | -0.3960862624 |
| C  | -0.5368005587 | 1.5484326303  | -1.6048312349 |
| C  | -0.5735385637 | 2.9381800629  | -1.636008691  |
| C  | -0.7472995996 | 3.6615961372  | -0.45668598   |
| C  | -0.8838955408 | 2.9848779722  | 0.7516254602  |
| C  | -0.8540222316 | 1.5917139449  | 0.7809653041  |
| H  | -0.9790760728 | 1.0587969896  | 1.7198661639  |
| H  | -1.0107228633 | 3.5407551064  | 1.6758443666  |
| H  | -0.7689629242 | 4.7467545489  | -0.4807286141 |
| H  | -0.4574324705 | 3.4593771091  | -2.581626264  |
| H  | -0.3554358746 | 0.9780511965  | -2.5124213293 |
| C  | -2.0656546661 | -1.1932921432 | -0.8901827894 |
| C  | -3.2597488523 | -0.6207720779 | -0.1287551949 |
| N  | -3.13486842   | -0.7645920278 | 1.3165040296  |
| C  | -4.0802299987 | 0.046135623   | 2.0090321833  |
| H  | -3.9673325373 | -0.0518739937 | 3.0925718078  |
| H  | -5.1608732011 | -0.299751981  | 1.772248994   |
| H  | -3.98829297   | 1.0950900868  | 1.7111842267  |
